# Supplementary material for: Single-molecule DNA unzipping reveals asymmetric modulation of a transcription factor by its binding site sequence and context
Source: PubMed Central journal article supplement — Nucleic Acids Res. 2017 Dec 14;46(3):1513–24. doi: 10.1093/nar/gkx1252 (PMC5815098; doi:10.1093/nar/gkx1252), 2017-12-14
Supplement: gkx1252_supp.pdf [file gkx1252_supp.pdf]

*Supplementary Information*

**Single-molecule DNA unzipping reveals asymmetric modulation of a transcription factor by its binding site sequence and context**

Sergei Rudnizky<sup>1,†</sup>, Hadeel Khamis<sup>1,2,†</sup>, Omri Malik<sup>1,3</sup>, Allison H. Squires<sup>4,#</sup>, Amit Meller<sup>3,4,5</sup>, Philippa Melamed<sup>1,3</sup> and Ariel Kaplan<sup>1,3,\*</sup>

<sup>1</sup>Faculty of Biology, Technion – Israel Institute of Technology, Haifa (32000), Israel, <sup>2</sup>Faculty of Physics, Technion – Israel Institute of Technology, Haifa (32000), Israel, <sup>3</sup>Russell Berrie Nanotechnology Institute, Technion – Israel Institute of Technology, Haifa (32000), Israel, <sup>4</sup>Department of Biomedical Engineering, Boston University, Boston, MA 02215, USA and <sup>5</sup>Faculty of Biomedical Engineering, Technion – Israel Institute of Technology, Haifa (32000), Israel

\* To whom correspondence should be addressed. Tel: +972-77-8871907; Fax: +972-77-8871908; Email: akaplanz@technion.ac.il

† These authors contributed equally to the paper as first authors

#Present address: Department of Chemistry, Stanford University, Stanford, CA 94305

## SUPPLEMENTARY FIGURES

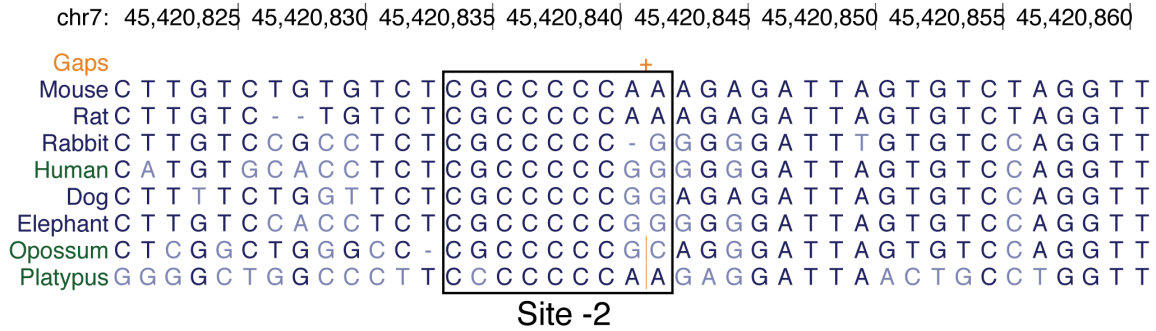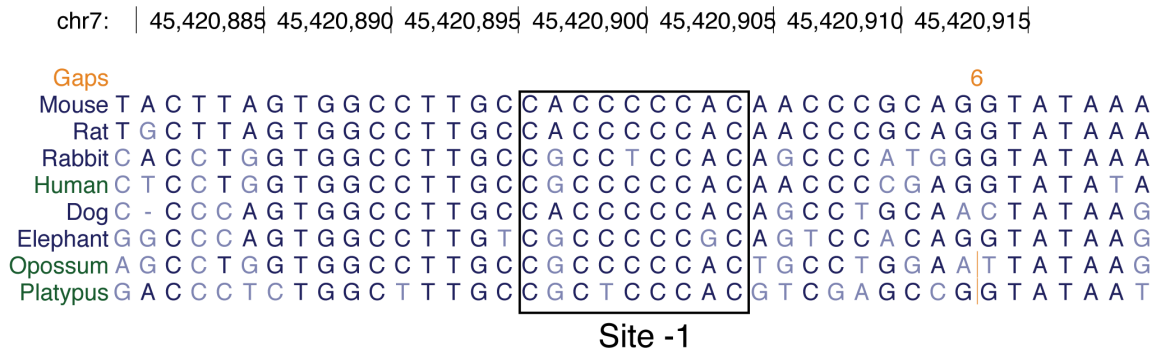

**Supplementary Figure S1: Binding sites for Egr-1 at the promoter of *Lhb* are evolutionary conserved.** Alignment of the proximal *Lhb* promoters from different species. The conserved Egr-1 response elements are boxed. Nucleotides that differ between the species are shaded. The data was generated with the Genome Browser software, <http://genome.ucsc.edu/>.

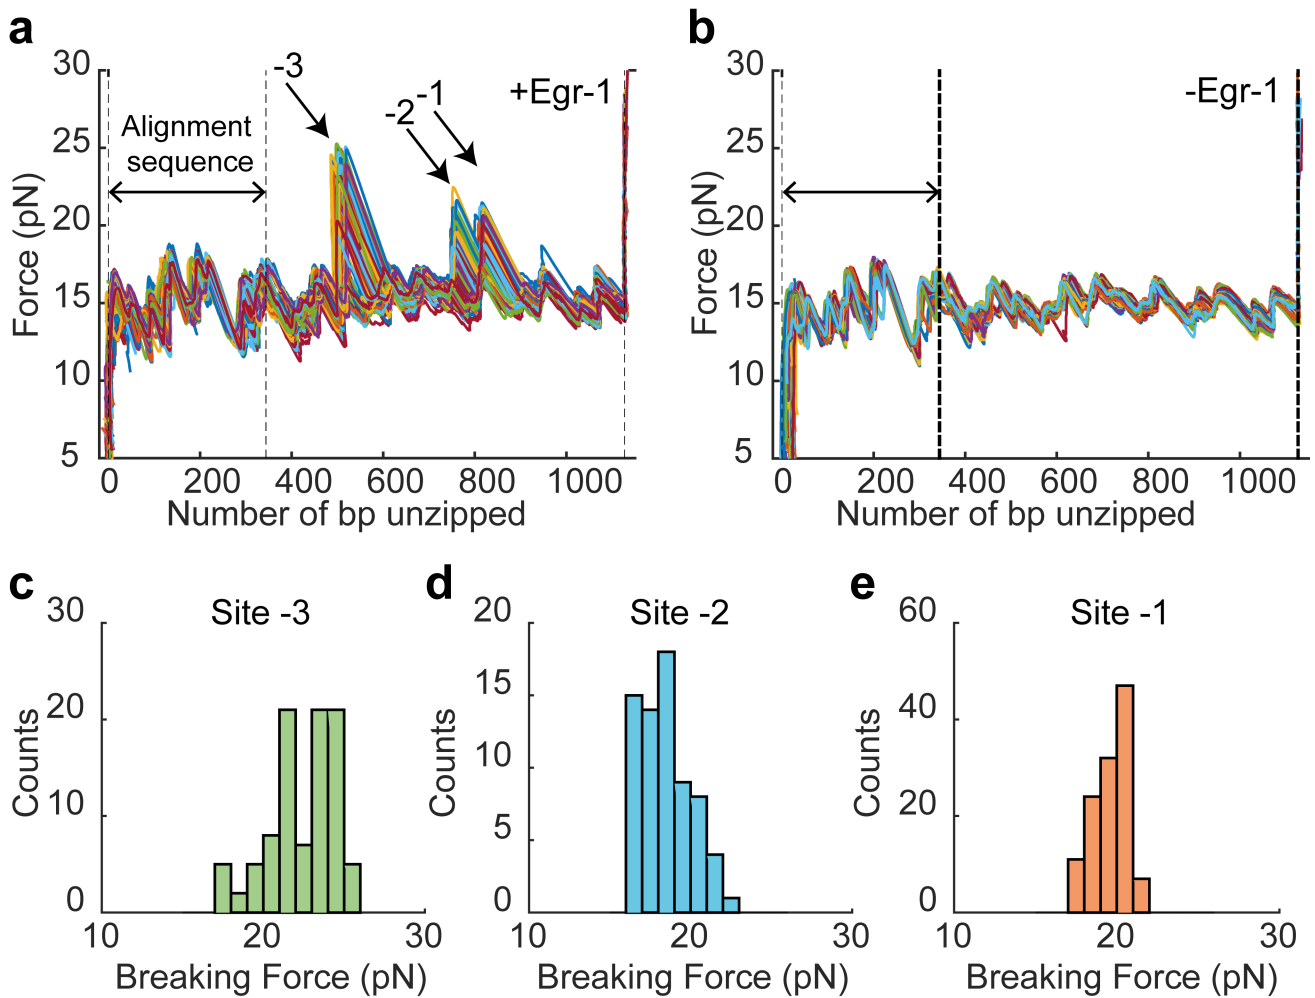

**Supplementary Figure S2: Characterization of binding probability and breaking force for sites -1,-2 and -3 in *Lhb*.** (a-b) All the collected traces for forward unzipping of *Lhb* in the presence (a) and absence (b) of Egr-1 (n=140 and 48, respectively). (c-e) Histograms for the breaking force for sites -3 (c), -2 (d) and -1 (e).

*lhb* site -3 ....5'-G C A A A T T T G G A [ggcccactc ] G T C A G A A C C T A-3'...  
*lhb* site -2 ....5'-T G T C T G T G T C T [cgcccccaa ] A G A G A T T A G T G-3'...  
*lhb* site -1 ....5'-A G T G G C C T T G C [cacccccac ] A A C C C G C A G G T-3'...  
C1 ....5'-T A T C T G A C A C G [Binding site] A C T A G G G A G T A-3'...  
C2 ....5'-T C A C T G C C G G C [Binding site] G A T G T A T A T A T-3'...

**Supplementary Figure S3: DNA context surrounding the 9 bp core binding sites probed in the unzipping experiments.** 11 base pairs surrounding the naturally occurring sites on the *Lhb* promoter (*Lhb* sites -1, -2 and -3) or supplied by the C1 or C2 contexts where the core binding sites are integrated.

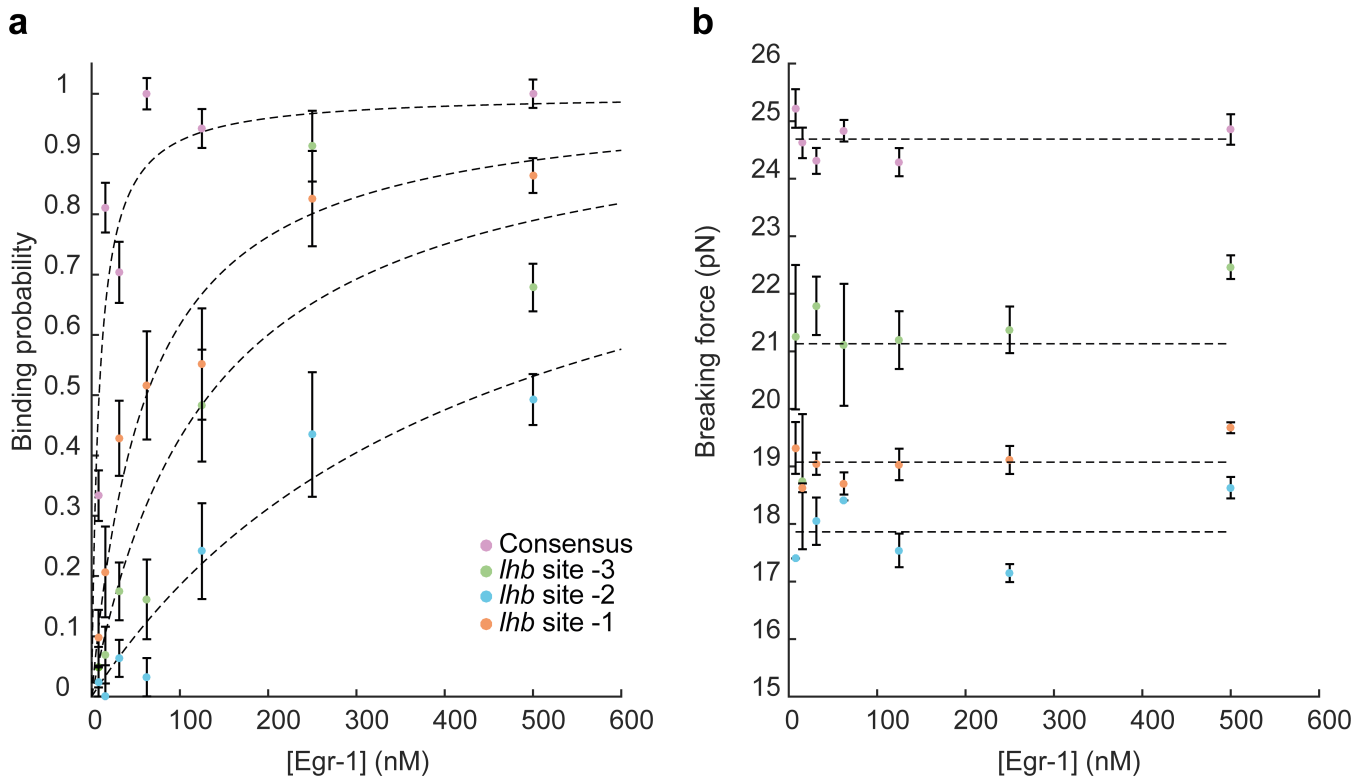

**Supplementary Figure S4: The binding probability depends on Egr-1 concentration, but the breaking force is concentration independent.** Multiple unzipping experiments were performed for the *Lhb* binding sites and for the consensus sequence integrated into the C1 DNA context, as a function of the concentration of Egr-1. (a) The binding probability and (b) mean breaking force data presented for sites -3/-2/-1 and consensus. The data is analyzed as in Fig 1. The dashed lines are hyperbolic (a) and linear (b) fits. The number of events for each case is shown in Supplementary Table 4.

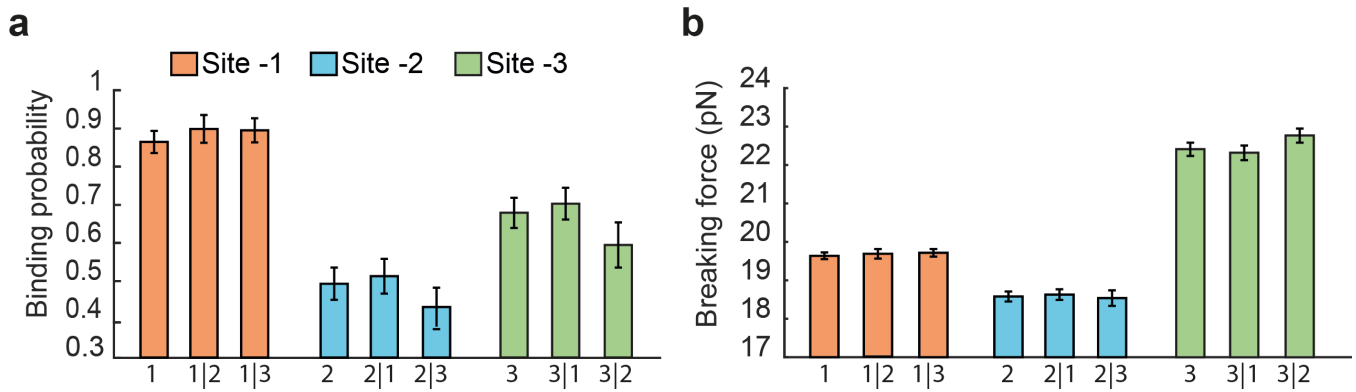

**Supplementary Figure S5: Binding of Egr-1 to a given site is independent of the occupancy of other sites *in cis*.** Binding probabilities (a) and mean breaking force (b) are shown for sites -1, -2 and -3 on *Lhb* DNA, both for the complete data set as well as for the conditional subsets ( $r|s$  indicates binding to site  $r$ , provided that site  $s$  was bound too). The data is analyzed and presented as in Fig 1.  $n=140$ .

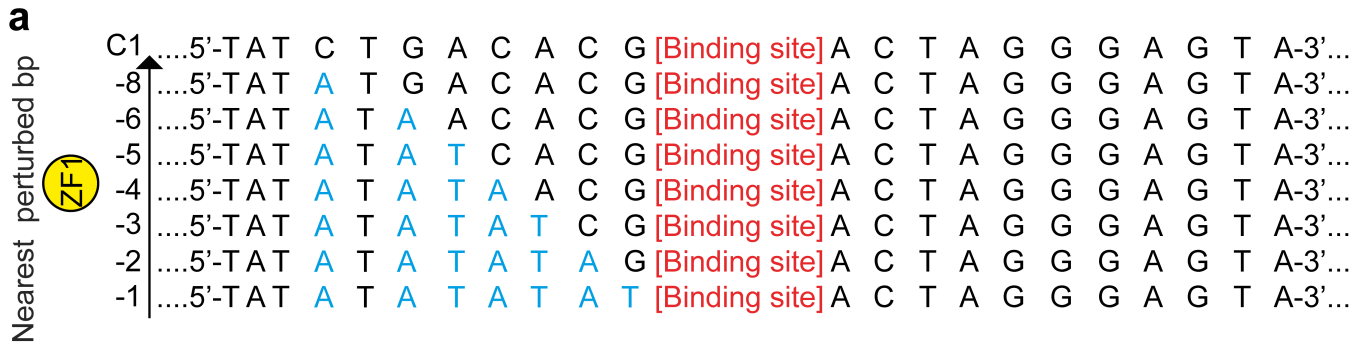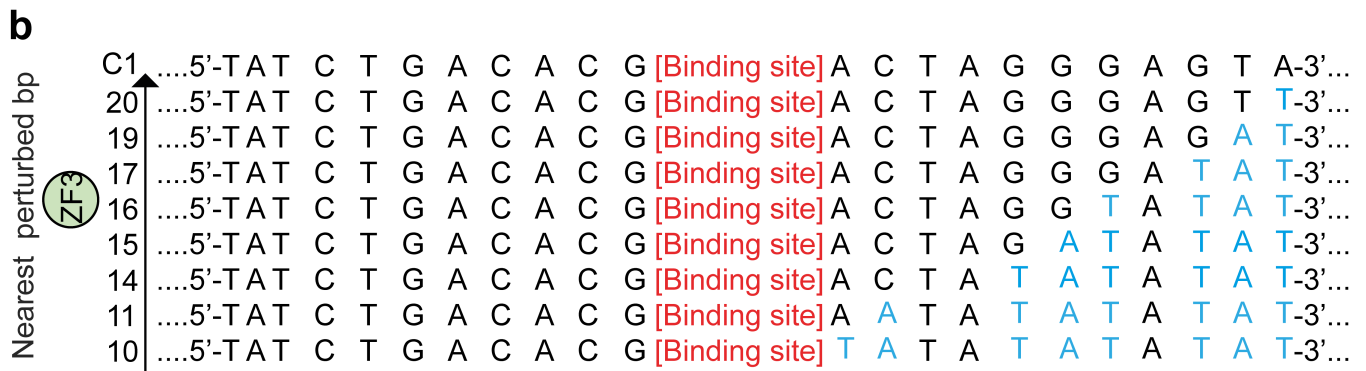

**Supplementary Figure S6: Constructs used to characterize the extent of the flanking sequence effect.** (a-b) Constructs used to perturb the flanking sequence at the ZF1 (a) or ZF3 (b) side of the core binding site. Mutagenized bases are shown in blue.

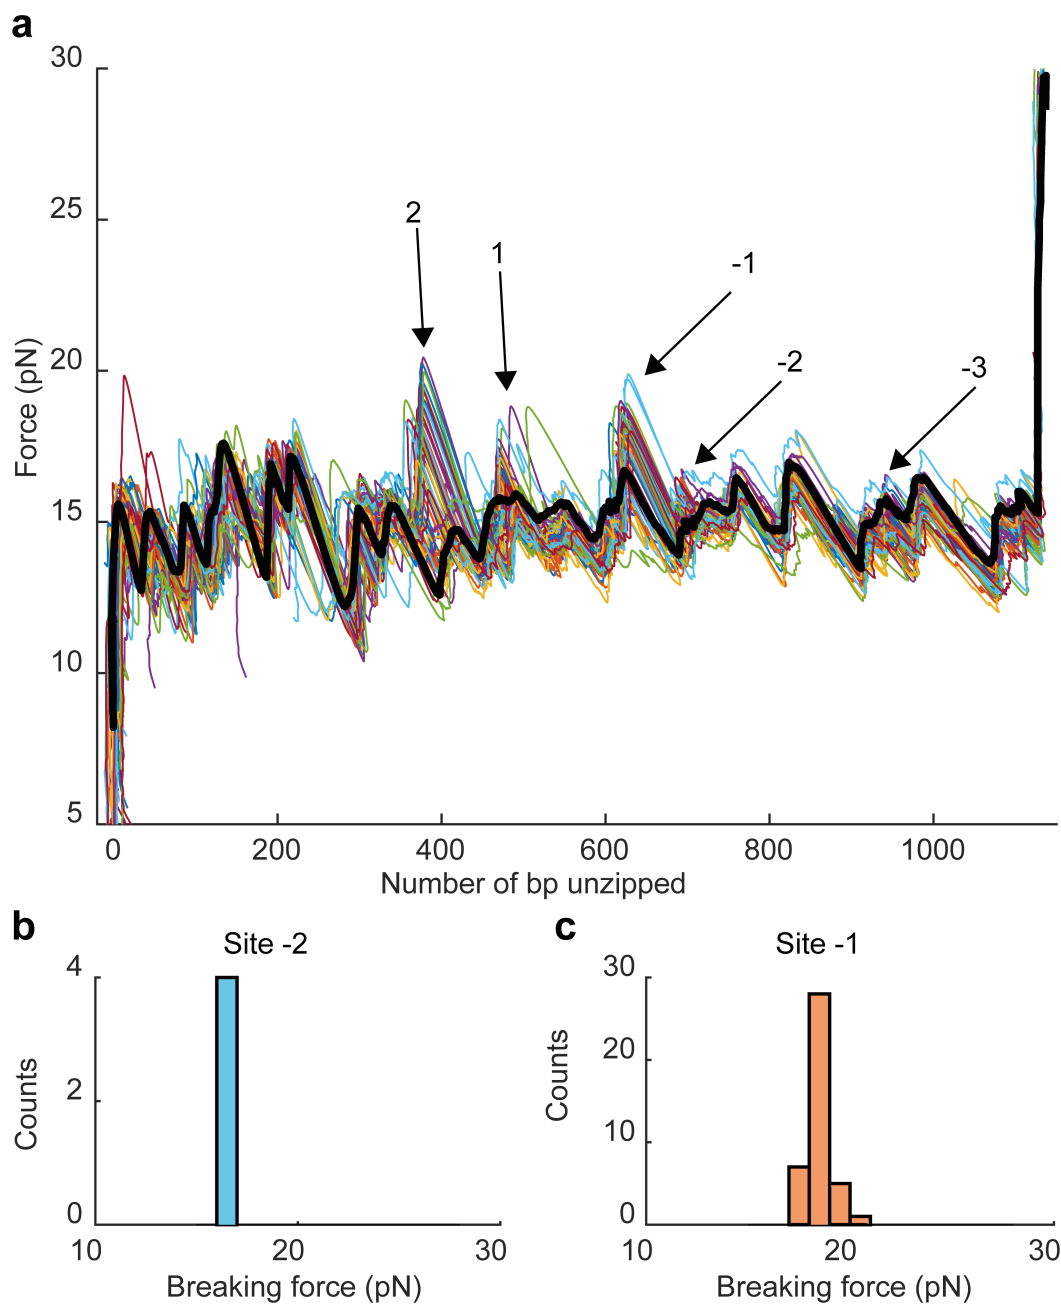

**Supplementary Figure S7: Characterization of binding probability and breaking force by reverse-unzipping *Lhb*.** (a) All the collected traces for reverse unzipping of *Lhb* in the presence of Egr-1 (n = 63). The position of sites -1, -2 and -3 is indicated. Sites 1 and 2, located in the gene body, were only observed in reverse unzipping. A representative trace in the absence of Egr-1 is shown in black. (b) Histograms for the breaking force for sites -2 and -1.



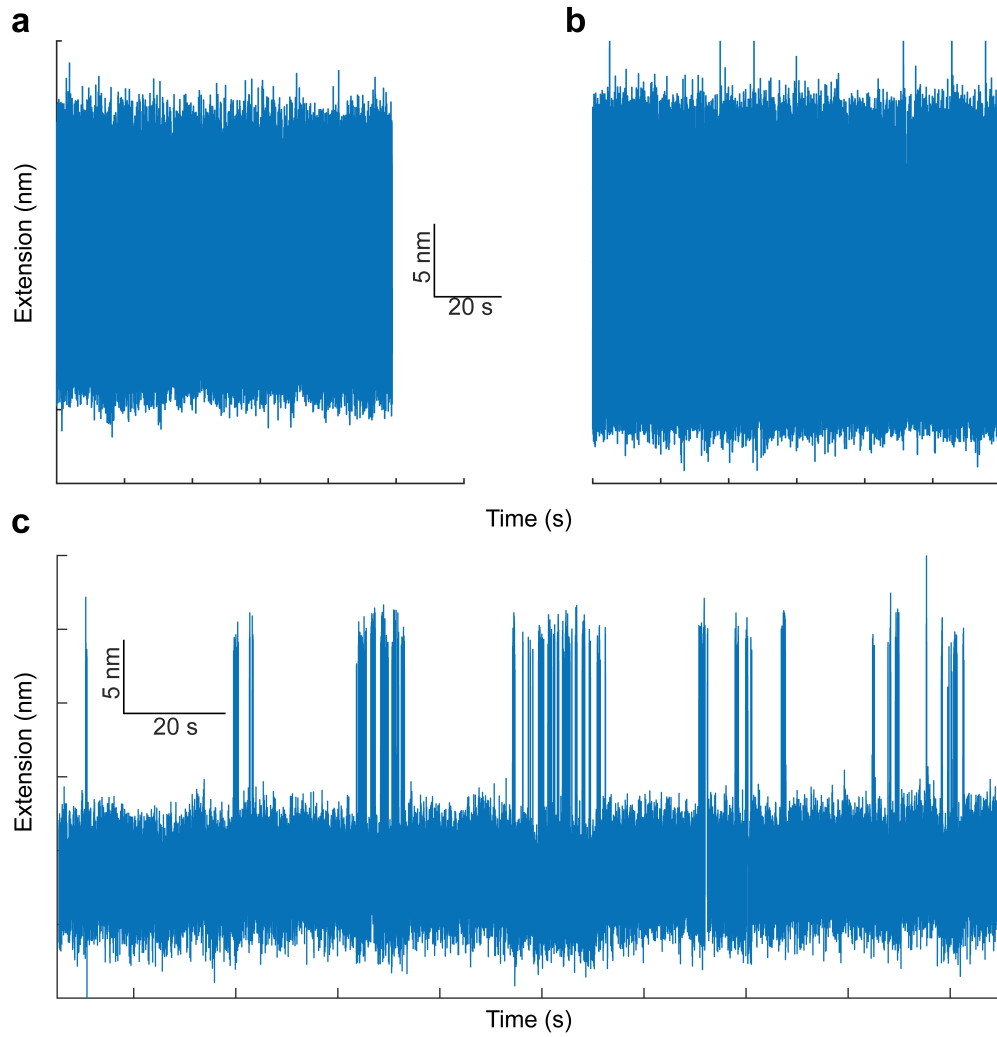

**Supplementary Figure S8: Dissociation time measurements.** (a-b) No suppression of fluctuations is observed in the absence of Egr-1, both for forward (a) and reverse (b) unzipping. (c) Multiple events of binding and dissociation are observed if the construct is kept at the Egr-1 flow channel. Data shown for reverse unzipping.

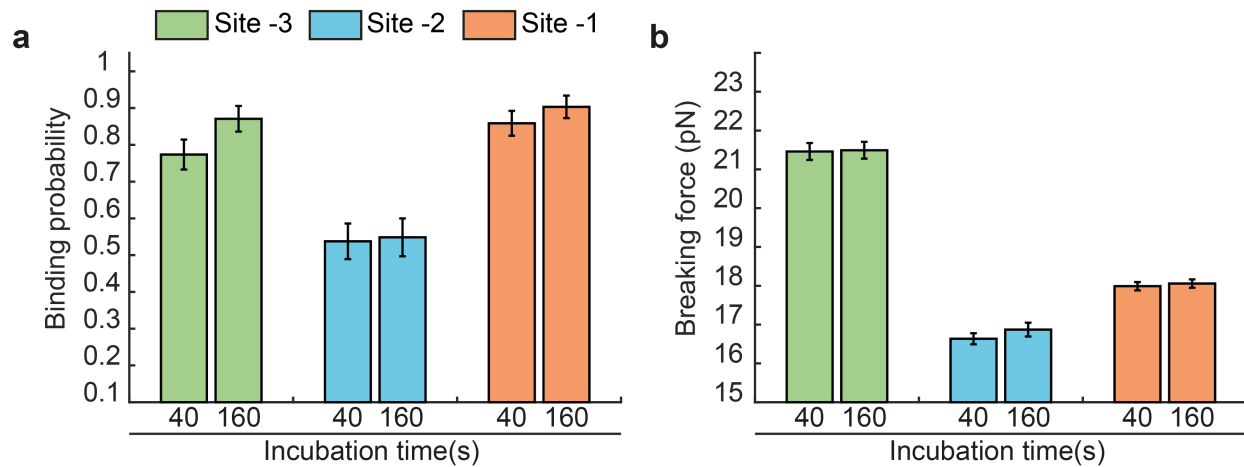

**Supplementary Figure S9: The incubation time is long enough to allow equilibration.** (a-b) Unzipping force-extension curves of *Lhb* in the presence of 500 nM Egr-1, for two different incubation times (defined as the time between successive unzipping cycles of a specific binding site). (a) Binding probability, calculated as the number of binding events out of the total number of DNA unzipping cycles, for each of the three Egr-1 binding sites. Data shown as fraction  $\pm$  s.e.,  $n=106,93$ . (b) Breaking force for three Egr-1 binding sites located on the *Lhb* promoter. Data shown as mean  $\pm$  s.e.,  $n=106,93$ . No significant differences were detected.

## SUPPLEMENTARY TABLES

**Supplementary Table S1: Number of experiments for the data in Figs. 2 and 5**

| Context              | Site -1 | Site -2 | Site -3 | Consensus |
|----------------------|---------|---------|---------|-----------|
| C2                   | 41      | 63      | 33      | 64        |
| C1                   | 213     | 47      | 78      | 41        |
| C1 (reverse)         | -       | -       | -       | 57        |
| <i>Lhb</i> (forward) | 140     | 140     | 140     | -         |
| <i>Lhb</i> (reverse) | 63      | 63      | 63      | -         |

**Supplementary Table S2: Number of experiments for the data in Fig. 3**

| Mutation | Consensus | Site -1 |
|----------|-----------|---------|
| 3'-C     | 162       | 111     |
| 3'-G     | 183       | 331     |
| 3'-T     | 178       | 482     |
| 5'-A     | 83        | 180     |
| 5'-C     | 76        | 103     |
| 5'-T     | 51        | 120     |

**Supplementary Table S3: Number of experiments for the data in Fig. 4**

| Nearest perturbed bp | Site -1 | Nearest perturbed bp | Site -1 |
|----------------------|---------|----------------------|---------|
| 10                   | 58      | -1                   | 73      |
| 11                   | 26      | -2                   | 140     |
| 14                   | 106     | -3                   | 75      |
| 15                   | 108     | -4                   | 109     |
| 16                   | 57      | -5                   | 86      |
| 18                   | 218     | -6                   | 130     |
| 19                   | 70      | -8                   | 109     |
| 20                   | 72      |                      |         |

**Supplementary Table S4: Number of experiments for the data in Supplementary Fig. 4**

|                    |     |    |    |    |     |     |     |
|--------------------|-----|----|----|----|-----|-----|-----|
| Concentration (nM) | 8   | 17 | 31 | 62 | 125 | 250 | 500 |
| <i>lhb</i>         | 41  | 29 | 63 | 31 | 29  | 23  | 140 |
| Consensus          | 126 | 90 | 81 | 37 | 52  | -   | 41  |

**Supplementary Table S5: Calculated p-values for the data in Fig. 2**

*Breaking force*

|            | Site -1 |      |            | Site -2 |     |            | Site -3 |     |            | Consensus |        |
|------------|---------|------|------------|---------|-----|------------|---------|-----|------------|-----------|--------|
|            | C2      | C1   | <i>Lhb</i> | C2      | C1  | <i>Lhb</i> | C2      | C1  | <i>Lhb</i> | C2        | C1     |
| C2         |         | 0.02 | 0.1        |         | 0.7 | 2E-08      |         | 0.7 | 1E-07      |           | 0.0007 |
| C1         |         |      | 0.001      |         |     | 9E-07      |         |     | 8E-08      |           |        |
| <i>Lhb</i> |         |      |            |         |     |            |         |     |            |           |        |

*Binding probability*

|            | Site 1 |      |            | Site 2 |       |            | Site 3 |      |            | Consensus |     |
|------------|--------|------|------------|--------|-------|------------|--------|------|------------|-----------|-----|
|            | C2     | C1   | <i>Lhb</i> | C2     | C1    | <i>Lhb</i> | C2     | C1   | <i>Lhb</i> | C2        | C1  |
| C2         |        | 0.01 | 0.007      |        | 5E-02 | 9E-02      |        | 0.02 | 0.8        |           | 0.1 |
| C1         |        |      | 0.6        |        |       | 4E-04      |        |      | 0.001      |           |     |
| <i>Lhb</i> |        |      |            |        |       |            |        |      |            |           |     |

**Supplementary Table S6: Calculated p-values for the data in Fig. 3**

*Binding probability, consensus*

| Mutation | C1 | 3'-C | 3'-G | 3'-T  | 5'-A | 5'-C | 5'-T |
|----------|----|------|------|-------|------|------|------|
| C1       |    | 0.2  | 0.5  | 0.007 | 0.3  | 0.01 | 0.1  |
| 3'-C     |    |      | 0.3  | 0.04  | 0.8  | 0.07 | 0.4  |
| 3'-G     |    |      |      | 0.004 | 0.5  | 0.02 | 0.2  |
| 3'-T     |    |      |      |       | 0.05 | 0.6  | 0.5  |
| 5'-A     |    |      |      |       |      | 0.06 | 0.4  |
| 5'-C     |    |      |      |       |      |      | 0.3  |
| 5'-T     |    |      |      |       |      |      |      |

*Binding probability, site -1*

| Mutation | C1 | 3'-C  | 3'-G  | 3'-T  | 5'-A  | 5'-C  | 5'-T  |
|----------|----|-------|-------|-------|-------|-------|-------|
| C1       |    | 1E-09 | 1E-09 | 1E-09 | 3E-05 | 0.005 | 0.5   |
| 3'-C     |    |       | 1E-01 | 0.1   | 1E-22 | 2E-14 | 2E-07 |
| 3'-G     |    |       |       | 0.7   | 1E-23 | 3E-14 | 6E-07 |
| 3'-T     |    |       |       |       | 1E-24 | 2E-14 | 6E-07 |
| 5'-A     |    |       |       |       |       | 0.4   | 5E-06 |
| 5'-C     |    |       |       |       |       |       | 0.001 |
| 5'-T     |    |       |       |       |       |       |       |

*Breaking force, consensus*

| Mutation | C1 | 3'-C | 3'-G | 3'-T | 5'-A  | 5'-C   | 5'-T  |
|----------|----|------|------|------|-------|--------|-------|
| C1       |    | 0.03 | 0.02 | 0.01 | 0.3   | 0.7    | 0.2   |
| 3'-C     |    |      | 0.4  | 0.7  | 0.05  | 0.001  | 0.1   |
| 3'-G     |    |      |      | 0.6  | 0.02  | 0.0005 | 0.08  |
| 3'-T     |    |      |      |      | 1E-02 | 0.0001 | 7E-02 |
| 5'-A     |    |      |      |      |       | 0.2    | 0.7   |
| 5'-C     |    |      |      |      |       |        | 0.1   |
| 5'-T     |    |      |      |      |       |        |       |

*Breaking force, site -1*

| Mutation | C1 | 3'-C  | 3'-G  | 3'-T  | 5'-A  | 5'-C  | 5'-T  |
|----------|----|-------|-------|-------|-------|-------|-------|
| C1       |    | 4E-11 | 7E-08 | 2E-43 | 1E-07 | 6E-08 | 4E-10 |
| 3'-C     |    |       | 0.04  | 1E-04 | 0.01  | 0.09  | 2E-01 |
| 3'-G     |    |       |       | 2E-18 | 0.6   | 0.7   | 2E-01 |
| 3'-T     |    |       |       |       | 8E-21 | 7E-13 | 2E-10 |
| 5'-A     |    |       |       |       |       | 0.4   | 0.1   |
| 5'-C     |    |       |       |       |       |       | 0.4   |
| 5'-T     |    |       |       |       |       |       |       |

**Supplementary Table S7: Calculated p-values for the data in Fig. 4**

*Breaking force, site -1, ZF1*

| Nearest perturbed bp | C1 | -1    | -2    | -3     | -4     | -5     | -6    | -8     |
|----------------------|----|-------|-------|--------|--------|--------|-------|--------|
| C1                   |    | 5E-10 | 2E-08 | 0.0002 | 0.04   | 0.08   | 0.9   | 0.1    |
| -1                   |    |       | 0.1   | 5E-02  | 0.0003 | 0.0001 | 7E-08 | 1E-05  |
| -2                   |    |       |       | 0.3    | 0.005  | 0.002  | 1E-06 | 0.0003 |
| -3                   |    |       |       |        | 0.1    | 0.07   | 0.001 | 0.03   |
| -4                   |    |       |       |        |        | 0.7    | 0.07  | 0.5    |
| -5                   |    |       |       |        |        |        | 0.1   | 0.7    |
| -6                   |    |       |       |        |        |        |       | 0.1    |
| -8                   |    |       |       |        |        |        |       |        |

*Binding probability, site -1, ZF1*

| Nearest perturbed bp | C1 | -1    | -2    | -3     | -4    | -5   | -6    | -8    |
|----------------------|----|-------|-------|--------|-------|------|-------|-------|
| C1                   |    | 0.003 | 0.08  | 0.01   | 0.9   | 0.4  | 0.6   | 0.006 |
| -1                   |    |       | 5E-05 | 0.5    | 0.005 | 0.03 | 0.001 | 0.4   |
| -2                   |    |       |       | 0.0003 | 0.1   | 0.02 | 0.2   | 3E-05 |
| -3                   |    |       |       |        | 0.02  | 0.1  | 0.006 | 0.9   |
| -4                   |    |       |       |        |       | 0.4  | 0.5   | 0.01  |
| -5                   |    |       |       |        |       |      | 0.2   | 0.08  |
| -6                   |    |       |       |        |       |      |       | 0.002 |
| -8                   |    |       |       |        |       |      |       |       |

*Breaking force, site -1, ZF3*

| Nearest perturbed bp | C1 | 10    | 11    | 14    | 15    | 16    | 18     | 19     | 20     |
|----------------------|----|-------|-------|-------|-------|-------|--------|--------|--------|
| C1                   |    | 3E-41 | 1E-26 | 1E-26 | 5E-28 | 2E-22 | 2E-34  | 2E-22  | 3E-29  |
| 10                   |    |       | 0.001 | 5E-07 | 7E-07 | 1E-05 | 1E-20  | 2E-18  | 3E-22  |
| 11                   |    |       |       | 0.1   | 0.1   | 0.2   | 9E-07  | 2E-07  | 2E-08  |
| 14                   |    |       |       |       | 0.7   | 0.6   | 0.002  | 0.0001 | 0.0001 |
| 15                   |    |       |       |       |       | 0.8   | 0.0004 | 3E-05  | 1E-05  |
| 16                   |    |       |       |       |       |       | 0.001  | 0.0001 | 5E-05  |
| 18                   |    |       |       |       |       |       |        | 0.09   | 0.1    |
| 19                   |    |       |       |       |       |       |        |        | 0.6    |
| 20                   |    |       |       |       |       |       |        |        |        |

*Binding probability, site -1, ZF3*

| Nearest perturbed bp | C1 | 10     | 11    | 14    | 15    | 16    | 18    | 19    | 20    |
|----------------------|----|--------|-------|-------|-------|-------|-------|-------|-------|
| C1                   |    | 0.0001 | 0.9   | 0.6   | 0.5   | 0.4   | 0.4   | 0.9   | 0.4   |
| 10                   |    |        | 3E-10 | 2E-09 | 2E-08 | 3E-07 | 7E-11 | 4E-10 | 4E-15 |
| 11                   |    |        |       | 0.5   | 0.3   | 0.2   | 0.1   | 0.9   | 0.3   |
| 14                   |    |        |       |       | 0.1   | 0.1   | 0.08  | 0.5   | 0.8   |
| 15                   |    |        |       |       |       | 0.7   | 0.7   | 0.3   | 0.04  |
| 16                   |    |        |       |       |       |       | 0.9   | 0.2   | 0.02  |
| 18                   |    |        |       |       |       |       |       | 0.2   | 0.01  |
| 19                   |    |        |       |       |       |       |       |       | 0.3   |
| 20                   |    |        |       |       |       |       |       |       |       |

**Supplementary Table S8: Calculated p-values for the data in Fig. 5**

|                     | Site -1 | Site -2 | Site -3 | Consensus |
|---------------------|---------|---------|---------|-----------|
| Breaking force      | 4E-11   | 0.018   | -       | 4E-22     |
| Binding probability | 4E-04   | 3E-09   | 3E-19   | 0.48      |

**Supplementary Table S9: Oligonucleotides used to synthesize the *Lhb* constructs.**

| Name             | Sequence                             |
|------------------|--------------------------------------|
| mLh -517F BglI   | ATGGCCTTGCCGGCGACACACCCCTTACTTCCAGAG |
| mLh +246R DraIII | ATCACTGCGTGTCTACCCCTGACCTGGTTTTTC    |

**Supplementary Table S10: Oligonucleotides used to synthesize the C1 and C2 constructs.**

|                                      |                      |                                                                |
|--------------------------------------|----------------------|----------------------------------------------------------------|
| Common reverse primer                | 601 R DraIII HP side | ATCACTGCGTGGTCACCGATGGACCCCTATACG                              |
| Forward primers for WT               | cons_5_prime_601_WT  | ATGGCCTTGCCGGCcgcccacgcGATGTATATATCTGACACGTGCCCTGGAGACTA       |
|                                      | site3_5_prime_601_WT | ATGGCCTTGCCGGCggcccactcGATGTATATATCTGACACGTGCCCTGGAGACTA       |
|                                      | site2_5_prime_601_WT | ATGGCCTTGCCGGCcgccccaaGATGTATATATCTGACACGTGCCCTGGAGACTA        |
|                                      | site1_5_prime_601_WT | ATGGCCTTGCCGGCcacccccacGATGTATATATCTGACACGTGCCCTGGAGACTA       |
|                                      | cons_601_WT          | ATGGCCTTGCCGGCGATGTATATATCTGACACGcgcccacgcACTAGGGAGTAATCCCCTTG |
|                                      | site3_601_WT         | ATGGCCTTGCCGGCGATGTATATATCTGACACGggcccactcACTAGGGAGTAATCCCCTTG |
|                                      | site2_601_WT         | ATGGCCTTGCCGGCGATGTATATATCTGACACGcgccccaaACTAGGGAGTAATCCCCTTG  |
|                                      | site1_601_WT         | ATGGCCTTGCCGGCGATGTATATATCTGACACGcacccccacACTAGGGAGTAATCCCCTTG |
| Forward primers for single mutations | site1_601_3flankT    | ATGGCCTTGCCGGCGATGTATATATCTGACACGcacccccacTCTAGGGAGTAATCCCCTTG |
|                                      | site1_601_3flankC    | ATGGCCTTGCCGGCGATGTATATATCTGACACGcacccccacCTAGGGAGTAATCCCCTTG  |
|                                      | site1_601_3flankG    | ATGGCCTTGCCGGCGATGTATATATCTGACACGcacccccacGCTAGGGAGTAATCCCCTTG |
|                                      | site1_601_5flankT    | ATGGCCTTGCCGGCGATGTATATATCTGACACTcacccccacACTAGGGAGTAATCCCCTTG |
|                                      | site1_601_5flankC    | ATGGCCTTGCCGGCGATGTATATATCTGACACCcacccccacACTAGGGAGTAATCCCCTTG |
|                                      | site1_601_5flankA    | ATGGCCTTGCCGGCGATGTATATATCTGACACAcacccccacACTAGGGAGTAATCCCCTTG |
|                                      | cons_601_3flankT     | ATGGCCTTGCCGGCGATGTATATATCTGACACGcgcccacgcTCTAGGGAGTAATCCCCTTG |
|                                      | cons_601_3flankC     | ATGGCCTTGCCGGCGATGTATATATCTGACACGcgcccacgcCTAGGGAGTAATCCCCTTG  |
|                                      | cons_601_3flankG     | ATGGCCTTGCCGGCGATGTATATATCTGACACGcgcccacgcGCTAGGGAGTAATCCCCTTG |
|                                      | cons_601_5flankT     | ATGGCCTTGCCGGCGATGTATATATCTGACACTcgcccacgcACTAGGGAGTAATCCCCTTG |



|                                        |                  |                                                                                                     |
|----------------------------------------|------------------|-----------------------------------------------------------------------------------------------------|
|                                        |                  | TAATCCCCTTG                                                                                         |
|                                        | cons_601_5flankC | ATGGCCTTGCCGGCGATGTATATATCTGACAC <b>C</b> gcccacgcACTAGGGAG<br>TAATCCCCTTG                          |
|                                        | cons_601_5flankA | ATGGCCTTGCCGGCGATGTATATATCTGACAC <b>A</b> gcccacgcACTAGGGAG<br>TAATCCCCTTG                          |
| Forward primers for multiple mutations | site1_5flankO8   | ATGGCCTTGCCGGCGATGTATATAT <b>A</b> TGACACG <b>c</b> ccccacACTAGGGAG<br>TAATCCCCTTG                  |
|                                        | site1_5flankO6   | ATGGCCTTGCCGGCGATGTATATAT <b>A</b> TAACACG <b>c</b> ccccacACTAGGGAG<br>TAATCCCCTTG                  |
|                                        | site1_5flankO5   | ATGGCCTTGCCGGCGATGTATATAT <b>A</b> TATCACG <b>c</b> ccccacACTAGGGAG<br>TAATCCCCTTG                  |
|                                        | site1_5flankO4   | ATGGCCTTGCCGGCGATGTATATAT <b>A</b> TATAACG <b>c</b> ccccacACTAGGGAG<br>TAATCCCCTTG                  |
|                                        | site1_5flankO3   | ATGGCCTTGCCGGCGATGTATATAT <b>A</b> TATATCG <b>c</b> ccccacACTAGGGAG<br>TAATCCCCTTG                  |
|                                        | site1_5flankO2   | ATGGCCTTGCCGGCGATGTATATAT <b>A</b> TATATAG <b>c</b> ccccacACTAGGGAG<br>TAATCCCCTTG                  |
|                                        | site1_5flankO1   | ATGGCCTTGCCGGCGATGTATATAT <b>A</b> TATATAT <b>c</b> ccccacACTAGGGAG<br>TAATCCCCTTG                  |
|                                        | site1_3flankO11  | ATGGCCTTGCCGGCGATGTATATATCTGACACG <b>c</b> ccccacACTAGGGAG<br><b>T</b> TATCCCCTTGGCGGTAAAA          |
|                                        | site1_3flankO10  | ATGGCCTTGCCGGCGATGTATATATCTGACACG <b>c</b> ccccacACTAGGGAG<br><b>A</b> TATCCCCTTGGCGGTAAAA          |
|                                        | site1_3flankO9   | ATGGCCTTGCCGGCGATGTATATATCTGACACG <b>c</b> ccccacACTAGGGAT<br><b>A</b> TATCCCCTTGGCGGTAAAA          |
|                                        | site1_3flankO7   | ATGGCCTTGCCGGCGATGTATATATCTGACACG <b>c</b> ccccacACTAGGT <b>A</b> T<br><b>A</b> TATCCCCTTGGCGGTAAAA |
|                                        | site1_3flankO6   | ATGGCCTTGCCGGCGATGTATATATCTGACACG <b>c</b> ccccacACTAG <b>A</b> TAT<br><b>A</b> TATCCCCTTGGCGGTAAAA |
|                                        | site1_3flankO5   | ATGGCCTTGCCGGCGATGTATATATCTGACACG <b>c</b> ccccacACT <b>A</b> TATAT<br><b>A</b> TATCCCCTTGGCGGTAAAA |
|                                        | site1_3flankO2   | ATGGCCTTGCCGGCGATGTATATATCTGACACG <b>c</b> ccccac <b>A</b> TATATAT<br><b>A</b> TATCCCCTTGGCGGTAAAA  |
|                                        | site1_3flankO1   | ATGGCCTTGCCGGCGATGTATATATCTGACACG <b>c</b> ccccac <b>T</b> AATATAT<br><b>A</b> TATCCCCTTGGCGGTAAAA  |

**Supplementary Table S11: Oligonucleotides used to synthesize the dsDNA handles and alignment segment.**

|                            |                                                           |
|----------------------------|-----------------------------------------------------------|
| 2k BioTg F                 | GATCTCCAGCCAGGAACTATTGA                                   |
| 2k bio R Nt.BvCI           | GTGTCAGCTTGCCCCCTCAGCGATGACCTCAGCATTTTTTCGACCTGCTCTTCAGCA |
| 2K DoubleDig2 bgl1F        | ATGGCCTAGACGGCGAGCCTGGGTTTATAAGGGGAGCGGTGA                |
| 2k Dig Nb.BbVCI R          | TCAGCTTGCCCCCTCAGCGATGACCTCAGCAAGGACCAGCGTTTTTGTTGAAA     |
| Oligo 5' Dig AGA           | AGGTGCCGGGACCACCCTGTAGA                                   |
| Oligo 3' Dig/ 5' phosphate | ACAGGGTGGTCCCCGGCACCT                                     |
| Alignment F DraIII CAC     | ATCACCACGTGGAATTCGATATCCCCGAGA                            |
| Alignment R DraIII         | ATGCACGCAGTGACCATGGTGGTGTTC                               |
| Hairpin oligo 5' phos      | GACTTGAGGCAATTGCCTCAAGTcgc                                |
